# Supplementary material for: The incubation period of Buruli ulcer (Mycobacterium ulcerans infection) in Victoria, Australia – Remains similar despite changing geographic distribution of disease
Source: PubMed Central journal article supplement (PMC5875870; doi:10.1371/journal.pntd.0006323), 2018-03-19

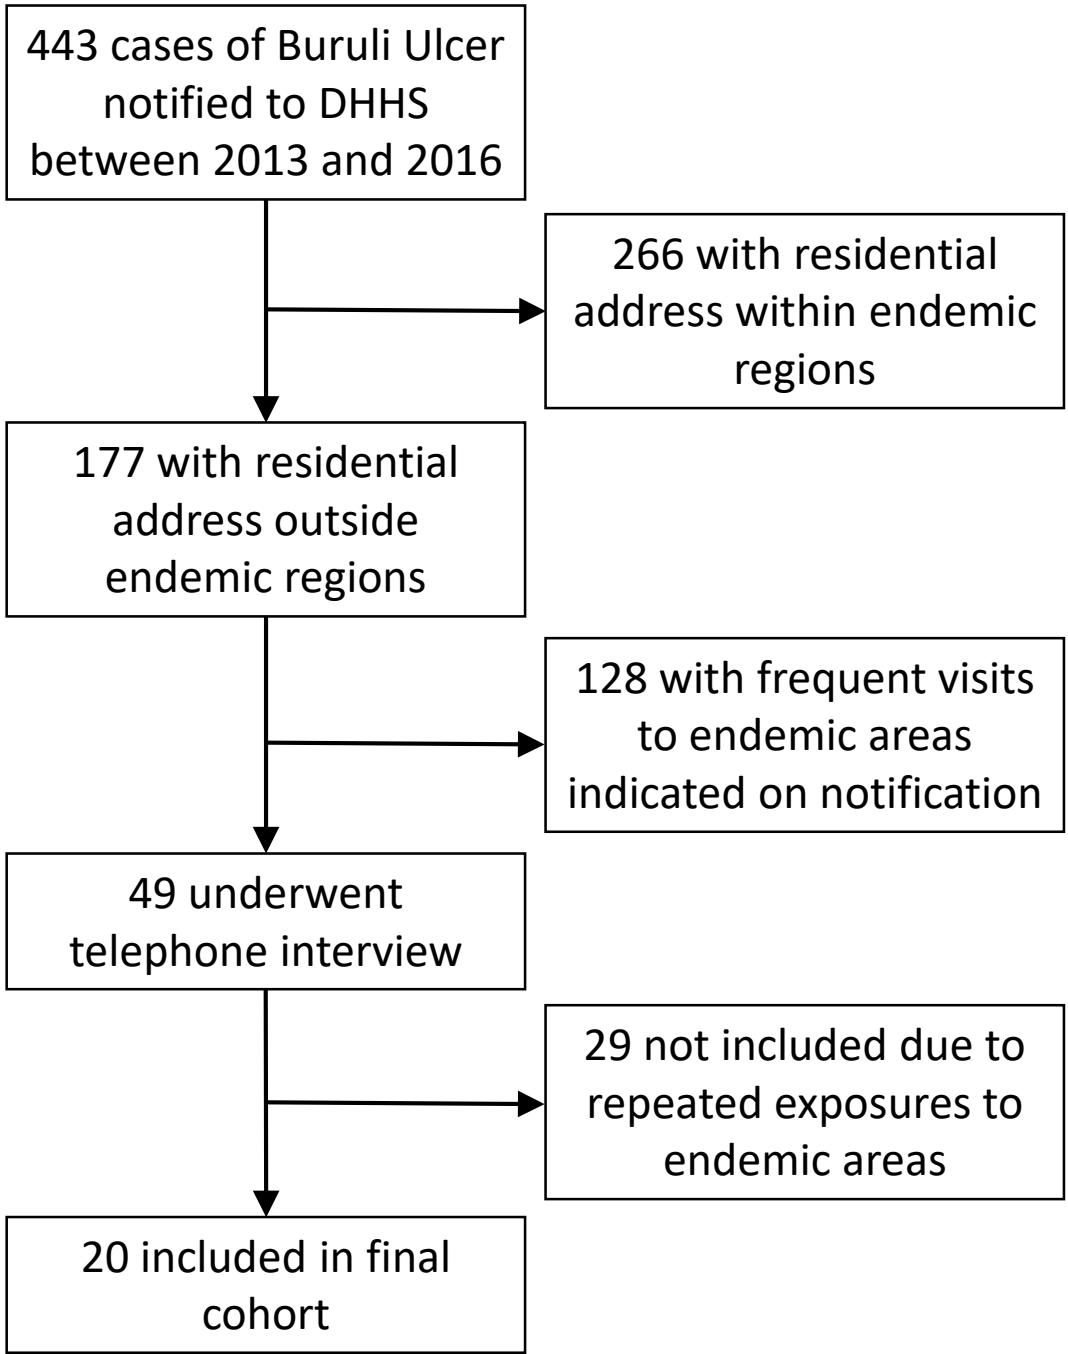

Supplement: pntd.0006323.s003.pdf [file pntd.0006323.s003.pdf]
